# Supplementary material for: Side-chain engineering of green color electrochromic polymer materials: toward adaptive camouflage application
Source: Royal Society of Chemistry journal article supplement (doi:10.1039/c6tc00197a), 2016-01-01
Supplement: c6tc00197a5.pdf [file c6tc00197a5.pdf]

## Supporting Information

### Side-Chain Engineering of Green Color Electrochromic Polymer Materials: Toward Adaptive Camouflage Application

Hongtao Yu,<sup>a,†</sup> Shan Shao,<sup>a,†</sup> Lijia Yan,<sup>b</sup> Hong Meng,<sup>\*,a,b</sup> Yaowu He,<sup>a</sup> Chao Yao,<sup>a</sup> Panpan Xu,<sup>a</sup> Xiaotao Zhang,<sup>c,d</sup> Wenping Hu,<sup>c</sup> Wei Huang,<sup>\*,b</sup>

---

**Fabrication.** Acetonitrile (ACN), dichloromethane (DCM), toluene (TOL), Propylene carbonate (PC), polymethyl methacrylate (PMMA) and other chemicals were purchased from Aldrich. 2,3-Bis(3-methoxyphenyl)-5,8-bis(2,3-dihydrothieno[3,4-b][1,4]dioxin-5-yl)quinoxaline (G1),<sup>[1]</sup> 2,3-Bis(3,4-bis(decyloxy)phenyl)-5,8-bis(2,3-dihydrothieno[3,4-b][1,4]dioxin-5-yl)quinoxaline (G2),<sup>[2]</sup> and 2,3-Bis(3,4-bis((2-octyldodecyl)oxy)phenyl)-5,8-bis(2,3-dihydrothieno[3,4-b][1,4]dioxin-5-yl)quinoxaline (G3)<sup>[2]</sup> were synthesized according to the reported methods. ACN and DCM were dried and distilled over calcium hydride under nitrogen. All electrochemical studies were accomplished with a CHI620E electrochemical workstation. Electropolymerizations (PG1, PG2 and PG3) were performed in a three-electrode cell that consisted of a platinum button or ITO-coated glass as the working electrode, a platinum wire as the counter electrode, and a Ag wire as the pseudo-reference electrode. Electrodeposition was performed from a 0.1 M of TBAPF<sub>6</sub> in DCM or in a mixture of DCM and ACN (50/50, v:v) system at a scan rate 100 mV s<sup>-1</sup> for 15 cycles. Cyclic voltammograms of the polymers were obtained using the same electrode setup using monomer-free ACN solution with 0.1 M TBAPF<sub>6</sub>. UV Vis-NIR spectra were recorded on a Shimadzu UV-2600 spectrophotometer at a scan rate of 2000 nm min<sup>-1</sup>. A three-electrode cell was utilized that consisted of a silver wire reference electrode, a Pt wire counter electrode, and an ITO-coated glass working electrode. The potentials were controlled using a CHI620E electrochemical workstation. Colorimetry measurements were achieved with a Minolta CS-100A Chroma Meter with a 0/0 (normal/normal) viewing geometry as recommended by CIE. The sample was illuminated from behind by a D50 (5000 K) light source in a light booth specially designed to exclude external light and to illuminate from behind.

2,3-Bis(3-methoxyphenyl)-5,8-bis(2,3-dihydrothieno[3,4-b][1,4]dioxin-5-yl)quinoxaline (G1): <sup>1</sup>H-NMR (300M, CDCl<sub>3</sub>): δ[ppm] 8.59 (s, 2H), 7.73 (d, 4H), 6.92 (d, 4H), 6.56 (d, 2H), 4.36 (d, 8H), 3.86 (s, 6H) <sup>13</sup>C-NMR (300 M, CDCl<sub>3</sub>): δ 160.13, 150.19, 141.29, 131.92, 113.58, 102.90, 99.94, 64.93, 64.89, 55.23 [ppm]. MS (*m/z*): 621 [M<sup>+</sup>].

2,3-Bis(3,4-bis(decyloxy)phenyl)-5,8-bis(2,3-dihydrothieno[3,4-b][1,4]dioxin-5-yl)quinoxaline (G2): <sup>1</sup>H NMR (300 MHz, CDCl<sub>3</sub>, 25 °C, TMS, d): 0.88 (t, 12H, J = 6.0 Hz), 1.1-1.4 (m, 72 H), 1.75-1.86 (m, 8H), 3.94 (t, 4H, J = 6.0 Hz), 4.02 (t, 4H, J = 6.0 Hz), 4.30 (m, 4H), 4.39 (m, 4H), 6.05 (s, 2H), 6.81 (d, 2H, J = 9 Hz), 7.28 (d, 2H, J = 3 Hz), 7.48 (s, 2H), 8.58 (s, 2H). <sup>13</sup>C NMR (300 MHz, 25 °C, TMS, CDCl<sub>3</sub>, d): 14.09, 22.66, 26.01, 26.05, 29.12, 29.20, 29.35, 29.42, 29.44, 29.62, 29.68, 31.90, 64.30, 64.89, 69.00, 69.09, 76.55, 76.98, 77.40, 102.64, 112.57, 113.36, 115.63, 123.49, 127.55, 128.31, 131.24, 136.65, 140.19, 141.35, 148.50, 149.76, 150.21. MS (*m/z*): 1298.8 [M<sup>+</sup>].

2,3-Bis(3,4-bis((2-octyldodecyl)oxy)phenyl)-5,8-bis(2,3-dihydrothieno[3,4-b][1,4]dioxin-5-yl)quinoxaline (G3): <sup>1</sup>H NMR (400 MHz, CDCl<sub>3</sub>): d (ppm) 0.86-0.88 (m, J = 6 Hz, 24H), 1.25-1.54 (m, 128 H), 1.76-1.83 (m, 4H), 3.84-3.87 (m, 8H, J = 6.0 Hz), 4.31 (m, 4H), 4.40 (m, 4H), 6.48 (s, 2H), 6.79 (d, 2H, J = 9 Hz), 7.19 (d, 2H, J = 3 Hz), 7.60 (d, 2H, J = 3 Hz), 8.58 (s, 2H). <sup>13</sup>C NMR (300 MHz, CDCl<sub>3</sub>): d (ppm) 14.08, 22.67, 26.87, 26.05, 29.34, 29.36, 29.38, 29.44, 29.66, 29.68, 29.71, 29.74, 29.79, 31.91, 64.29, 64.90, 71.76, 71.90, 76.55, 76.97, 77.39, 102.59, 112.38, 113.40, 115.68, 123.40, 127.45, 128.28, 131.17, 136.61, 140.17, 141.36, 149.14, 150.19, 150.27. MS (*m/z*): 1748.1 (M<sup>+</sup>)

**Polymerization.**<sup>[3]</sup> Poly(2,3-bis(3-methoxyphenyl)-5,8-bis(2,3-dihydrothieno[3,4-b][1,4]dioxin-5-yl)quinoxaline) (PG1); Poly(2,3-bis(3,4-bis(decyloxy)phenyl)-5,8-bis(2,3-dihydrothieno[3,4-b][1,4]dioxin-5-yl)quinoxaline) (PG2); Poly(2,3-bis(3,4-bis((2-octyldodecyl)oxy)phenyl)-5,8-bis(2,3-dihydrothieno[3,4-b][1,4]dioxin-5-yl)quinoxaline) (PG3). A solution of G1, G2 and G3 (3.15 g, 0.01 M) dissolved in dry chloroform (50 mL) was added (via syringe) under an argon atmosphere to a suspension of FeCl<sub>3</sub> (6.48 g, 0.04 M) in 100 mL of chloroform at room temperature. The polymerization started immediately with the appearance of a brown-black color. The reaction mixture was stirred at room temperature for 24 h and then heated to 50 °C for a further 24 h. After cooling to room

temperature, the mixture was poured into 400 mL of methanol. The precipitated black polymer was isolated by centrifugation.

Poly(2,3-bis(3,4-bis((2-octyldodecyl)oxy)phenyl)-5,8-bis(2,3-dihydrothieno[3,4-b][1,4]dioxin-5-yl)quinoxaline) (PG3):  $^1\text{H}$  NMR (400 MHz,  $\text{CDCl}_3$ ): d (ppm) 2.17-0.44 (m, 84H), 4.69-3.46 (m, 16H), 6.83 (s, 2H), 7.26 (s, 4H), 8.68 (s, 2H).

**Device Assembly.** Conductive cloth electrodes were used as-cut from large Ag woven cloth (composed by fiber (55%), Ni (15%), Cu (15%) and Ag (15%)). A gel electrolyte comprising 0.3 g of  $\text{LiClO}_4$ , 2 g of PC, 7 g of ACN, and 0.7 g of PMMA was used for all devices. The clothes for working electrodes were spray-coated with PG3 polymer from toluene or dichloromethane using OW-130 spray coater. A fiberglass separator soaked with a gel electrolyte was placed between the working and counter cloth electrodes. The measurements are done before the solvents of gel electrolyte was evaporated totally.

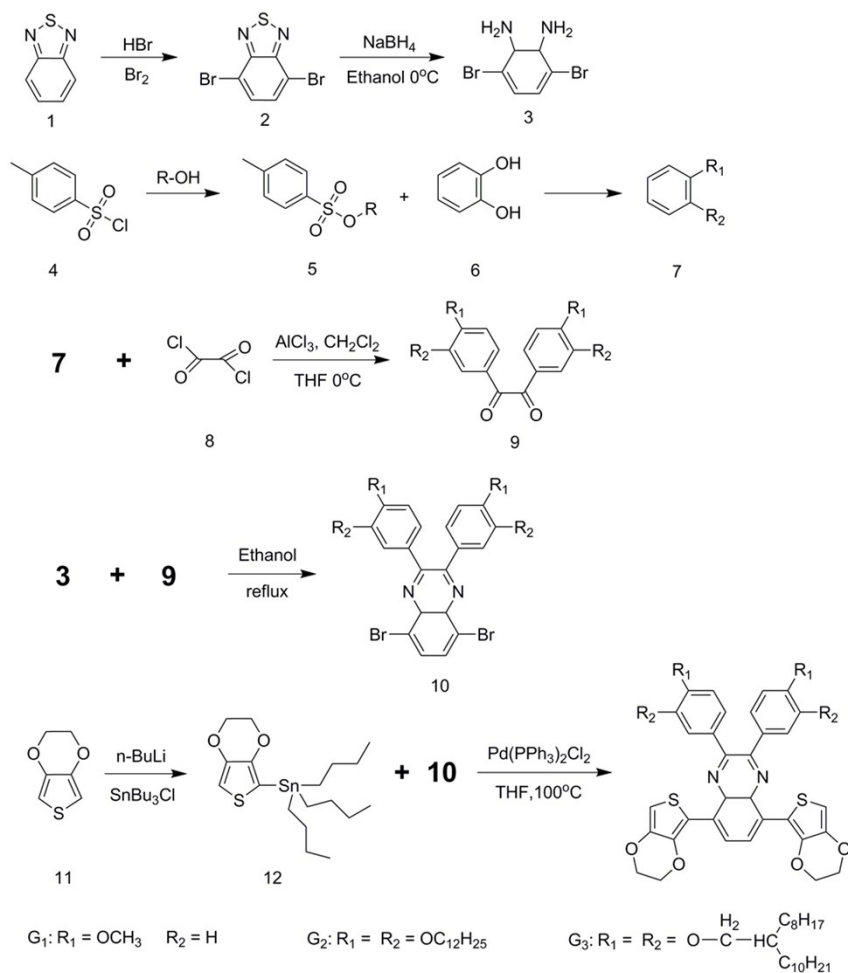

**Figure S1.** Synthesis of G1, G2 and G3.

**Table 1.** The solubility of G1, G2 and G3 monomer in common solvents

|                   | G1  | G2  | G3  |
|-------------------|-----|-----|-----|
| Acetonitrile      | S   | InS | InS |
| Ethanol           | InS | InS | InS |
| Acetone           | S   | S   | S   |
| DMSO              | S   | InS | InS |
| DMF               | S   | S   | S   |
| CHCl <sub>3</sub> | S   | S   | S   |
| PC                | S   | InS | InS |
| DCM               | S   | S   | S   |
| Toluene           | S   | S   | S   |

(S = Soluble; InS = Insoluble)

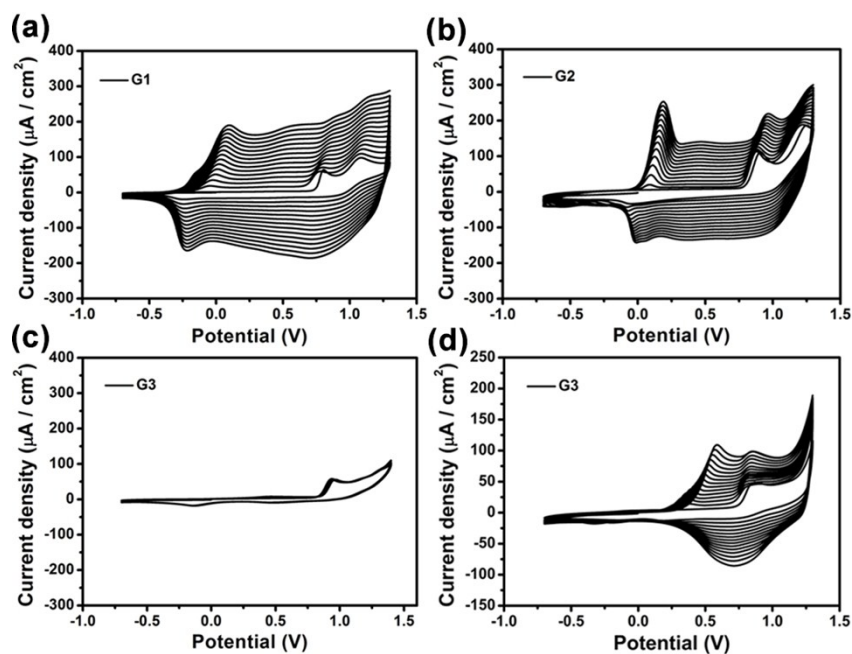

**Figure S2.** (a) (b) (c) Repeated potential scan electropolymerization of G1, G2 and G3 in 0.1 M TBAPF<sub>6</sub>/DMC at 100 mV s<sup>-1</sup> on a Pt electrode; (d) G3 in 0.1 M TBAPF<sub>6</sub>/DMC/ACN (V:V = 1:1) at 100 mV s<sup>-1</sup> on a Pt electrode.

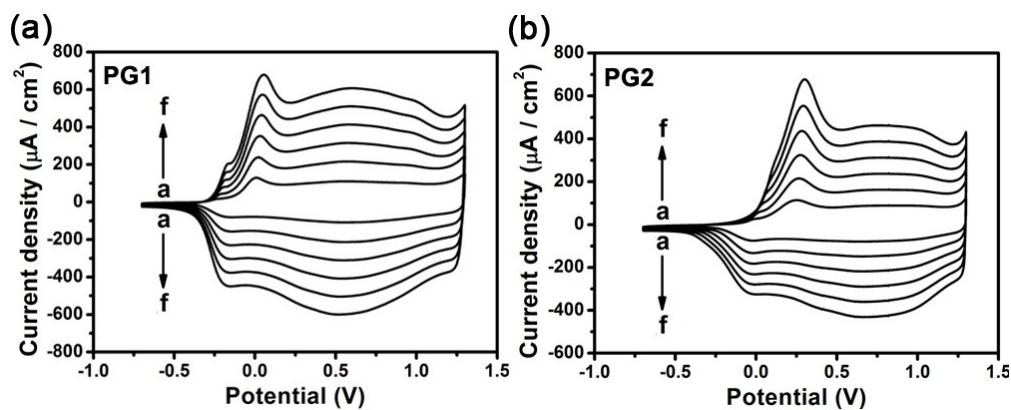

**Figure S3.** (a) (b) Scan rate dependence of PG1, and PG2 film in 0.1 M TBAPF<sub>6</sub>/ACN at a) 50, b) 100, c) 150, d) 200, e) 250 and f) 300 mV/s, respectively.

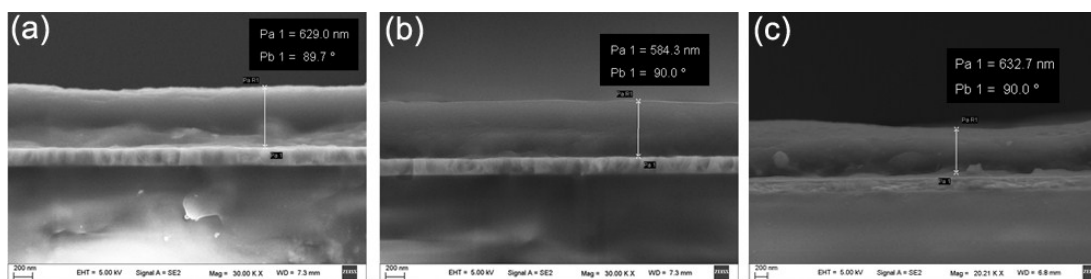

**Figure S4.** (a) (b) (c) SEM images of PG1, PG2 and PG3 on an ITO substrate. PG1 and PG2 are coated by potentiodynamic method and PG3 by the spray-coating method.

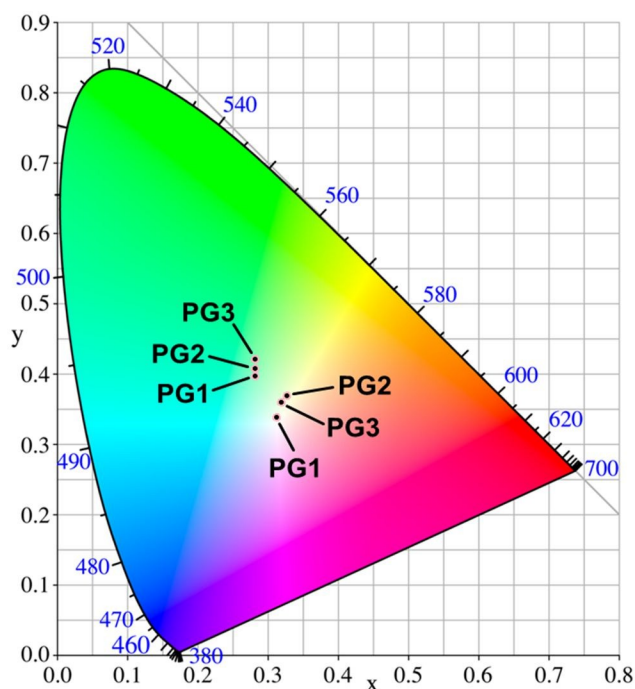

**Figure S5.** Representation of the hue and saturation  $x$ - $y$  track for PG1, PG2 and PG3 film at their fully neutral and oxidized state.

**Movie S1.** Water droplets on PG3 modified surface of a rough paper by spray-coating.

**Movie S2.** Reversible change of electrochromic letters in the fully neutral (-1.5 V) and oxidized state (+1.5 V).

**Movie S3.** Reversible change of electrochromic fabric device in the fully neutral (-1.5 V) and oxidized state (+1.5 V).

**Movie S4.** Reversible change of chameleonic electrochromic device between the green (-2.0 V for half pieces) and sand color (+2.0 V for half pieces).

## References:

- (1) G. E. Gunbas, A. Durmus, L. Toppare. Could Green be Greener? Novel Donor–Acceptor-Type Electrochromic Polymers: Towards Excellent Neutral Green Materials with Exceptional Transmissive Oxidized States for Completion of RGB Color Space. *Advanced Materials* **2008**, 20, 691.

- (2) G. E. Gunbas, A. Durmus, L. Toppare. A Unique Processable Green Polymer with a Transmissive Oxidized State for Realization of Potential RGB-Based Electrochromic Device Applications. *Advanced Functional Materials* **2008**, *18*, 2026.
- (3) H. Meng, F. Wudl. A Robust Low Band Gap Processable n-Type Conducting Polymer Based on Poly (isothianaphthene). *Macromolecules* **2001**, *34*, 1810.
